# Supplementary material for: Structures of self-assembled n -alkanethiols on gold by reflection high-energy electron diffraction
Source: Royal Society of Chemistry journal article supplement (doi:10.1039/d0cp02866e), 2020-01-01
Supplement: d0cp02866e1.pdf [file d0cp02866e1.pdf]

# Structures of Self-Assembled *n*-Alkanethiols on Gold by Reflection High-Energy Electron Diffraction

Mithun Ghosh, Ding-Shyue Yang\*

*Department of Chemistry, University of Houston, Houston, Texas 77204, United States*

\*To whom correspondence should be addressed. Email: [yang@uh.edu](mailto:yang@uh.edu)

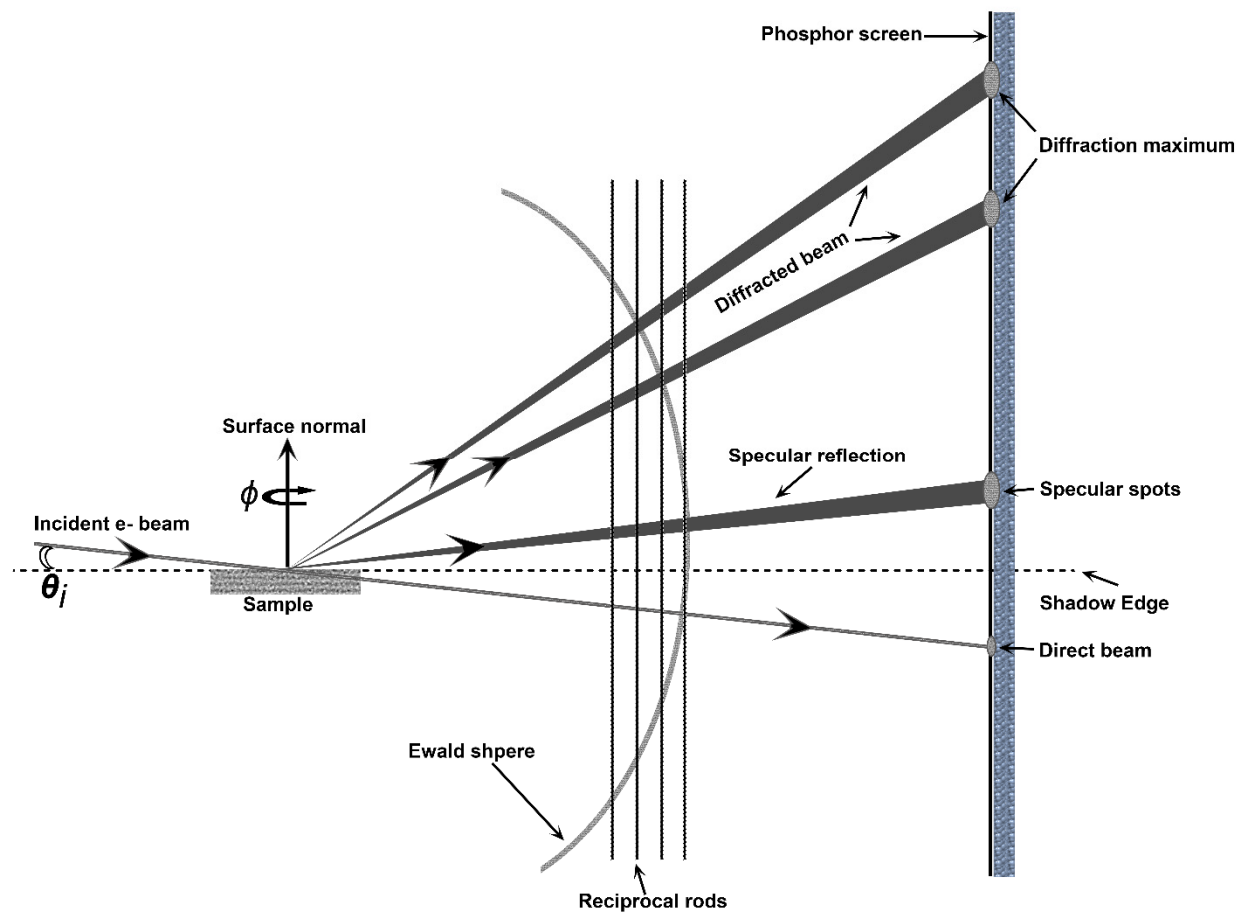

**Figure S1.** Schematic of a RHEED set-up and the Ewald construction for image formation from a two-dimensional lattice.

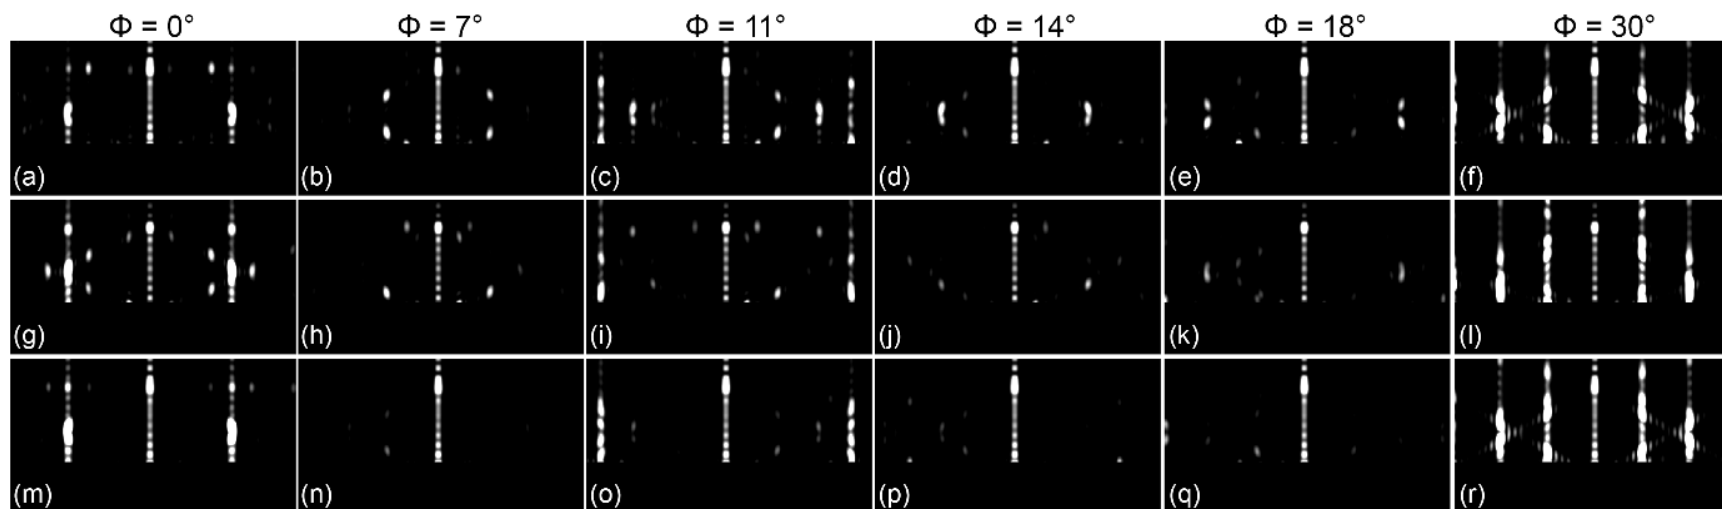

**Figure S2.** Simulated RHEED patterns according to three  $(2\sqrt{3} \times 3)_{\text{rect}}$  structures for select azimuths. (a–f) Based on Figure 1h with a combination of the models shown in Figure 1, c and g for the sulfur headgroups. (g–l) Based on Figure 1d with the sulfur headgroups as in Figure 1a. (m–r) Based on Figure 1f with the sulfur headgroups as in Figure 1e.
